# Supplementary material for: LZTR1 deficiency exerts high metastatic potential by enhancing sensitivity to EMT induction and controlling KLHL12-mediated collagen secretion
Source: PubMed Central journal article supplement (PMC10457367; doi:10.1038/s41419-023-06072-9), 2023-08-25
Supplement: 41419_2023_6072_MOESM1_ESM.pdf [file 41419_2023_6072_MOESM1_ESM.pdf]

1 **Title**

2 LZTR1 deficiency exerts high metastatic potential by enhancing sensitivity to EMT induction  
3 and controlling KLHL12-mediated collagen secretion

4

5 **Author Names:** Taiki Abe<sup>1,4\*</sup>, Shin-ichiro Kanno<sup>2</sup>, Tetsuya Niihori<sup>1</sup>, Miho Terao<sup>3</sup>, Shuji  
6 Takada<sup>3</sup>, Yoko Aoki<sup>1\*</sup>

7

8 **Affiliations**

9 <sup>1</sup> Department of Medical Genetics, Tohoku University School of Medicine, Sendai, Japan

10 <sup>2</sup> Division of Dynamic Proteome, Institute of Development, Aging, and Cancer, Tohoku  
11 University, Sendai, Japan

12 <sup>3</sup> Department of Systems BioMedicine, National Research Institute for Child Health and  
13 Development, Tokyo, Japan

14 <sup>4</sup> Lead contact

15

16 \*Correspondence should be addressed to Taiki Abe, Ph.D. and Yoko Aoki, MD, Ph.D.

17 Department of Medical Genetics, Tohoku University School of Medicine, Sendai 980-8574,  
18 Japan

19 Email: Taiki Abe, abet@med.tohoku.ac.jp; Yoko Aoki, aokiy@med.tohoku.ac.jp, Phone:

20 +81-22-717-8137, Fax: +81-22-717-8142

21

22 **This PDF file includes:** Supplementary Figures, and Supplementary Tables.

23

1 **Supplementary Figures**

**Supplemental Figure S1**

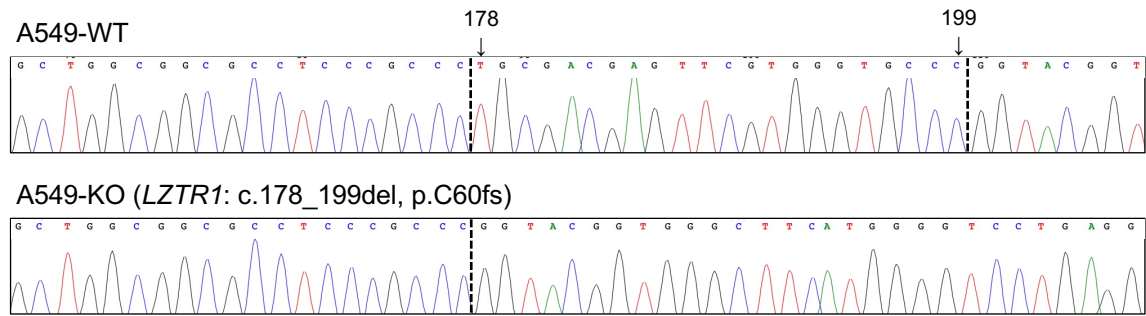

2

3

4 **Supplementary Figure S1.**

5 Sequence analysis of parental cells (A549-WT) and A549-KO cells.

6

## Supplemental Figure S2

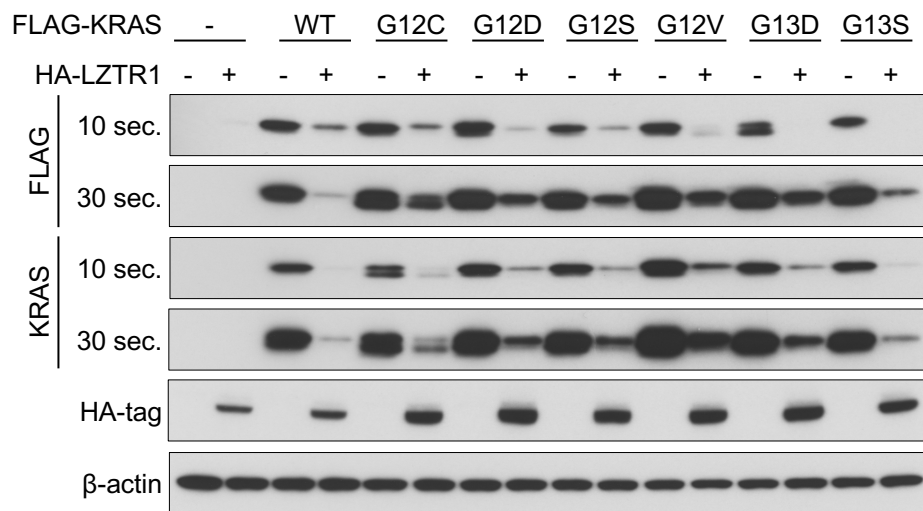

1

2

3 **Supplementary Figure S2.**

4 HEK293 cells were transfected with HA-LZTR1 and indicated FLAG-KRAS plasmids and

5 RAS expression levels evaluated.

6

Supplemental Figure S3

A: 24 h after drug treatment

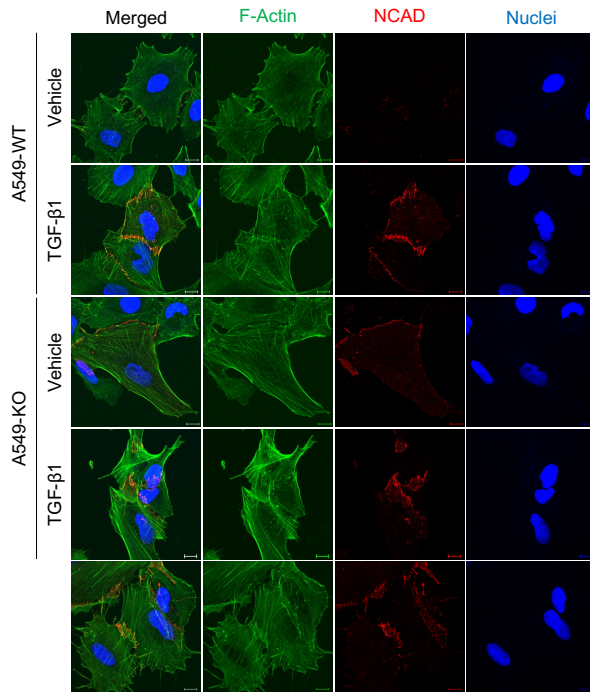

B: A549+siRNA-LZTR1+TGF-β1

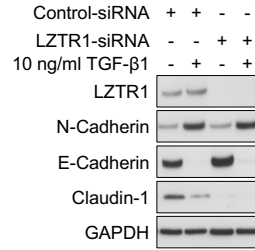

C

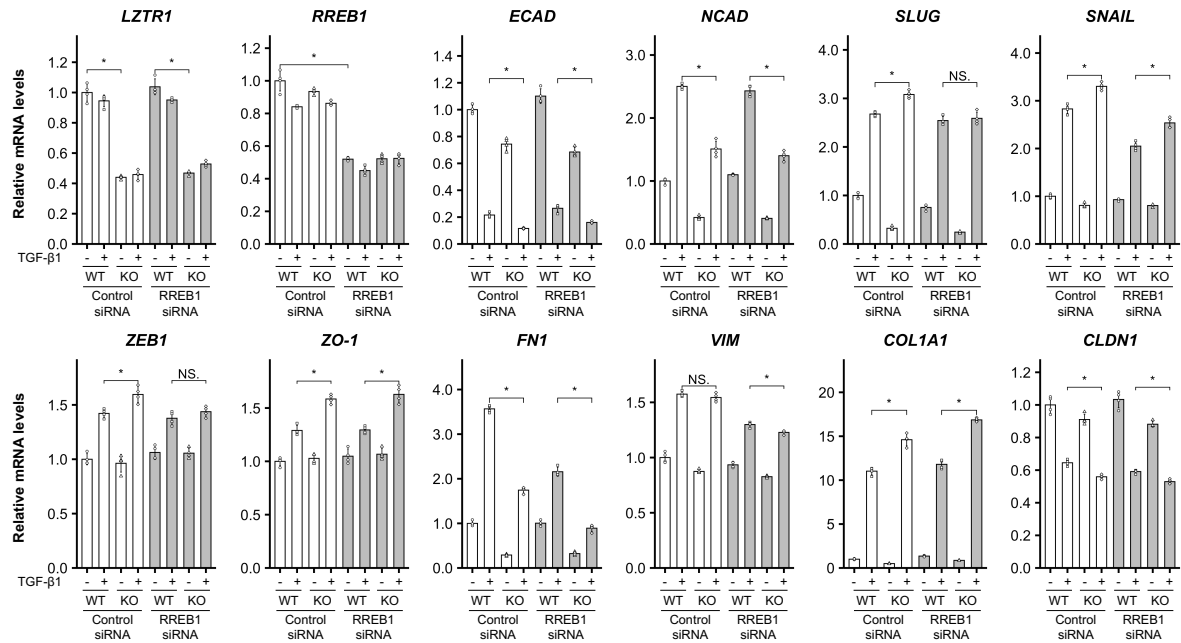

1 (A) Cells were treated with TGF- $\beta$ 1 for 24 h and stained with anti-N-cadherin (NCAD)  
2 antibody (red), ActinGreen 488 (F-actin, green) and NucBlue Stain (nuclei, blue). Scale bar,  
3 10  $\mu$ m. (B, C) A549 cell lines were transfected with 10 nM Control-siRNA, LZTR1-siRNA,  
4 or RREB1-siRNA. Cells were treated 24 h later with 10 ng/ml TGF- $\beta$ 1 for 24 h and the  
5 expression levels of EMT marker proteins were evaluated by western blot or RT-qPCR.  
6

**Supplemental Figure S4**

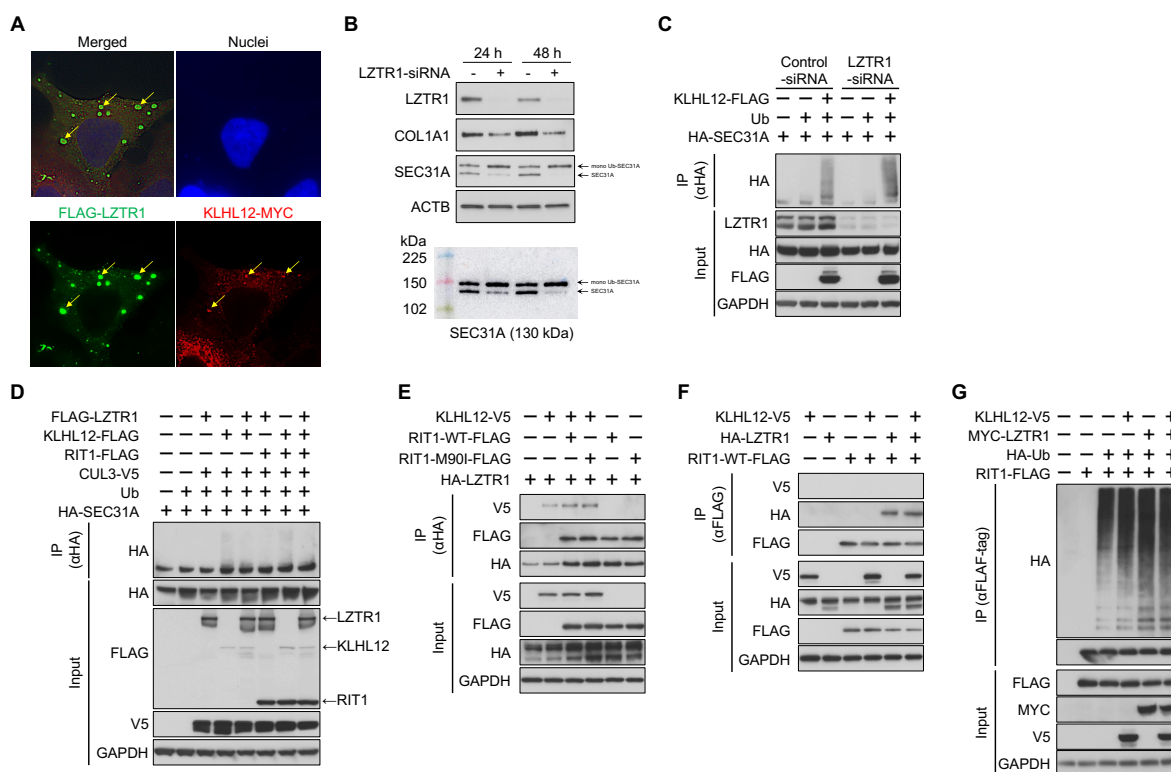

1  
2 **Supplementary Figure S4.**  
3 (A) HEK293 cells grown on 13 mm<sup>2</sup> glass coverslips (Matsunami Glass, Osaka, Japan) were  
4 transfected with FLAG-LZTR1 and KLHL12-Myc plasmids. The fixed cells were incubated  
5 in PBS containing 0.1% Triton X-100 for 10 minutes and incubated in BlockAid Blocking  
6 solution (Thermo Fisher Scientific) for 1 h at room temperature. The coverslips were  
7 incubated overnight at 4°C with primary antibodies diluted in Can Get Signal Immunostain  
8 Immunoreaction Enhancer Solution (Toyobo), and further incubated with secondary  
9 antibodies for 1 h at room temperature. The yellow arrows indicate representative locations  
10 where LZTR1 and KLHL12 overlap. (B) SK-N-SH cells were transfected with 10 nM  
11 Control-siRNA or LZTR1-siRNA. The expression levels of LZTR1, COL1A1, SEC31A, and  
12 ACTB were evaluated 24 or 48 h after transfection by western blot. (C) HEK293 cells were  
13 transfected with indicated plasmids and siRNAs. Cell extracts were subjected to in vivo

1 ubiquitination assay. (D) The influence of RIT1 expression on LZTR1-mediated  
2 KLHL12/SEC31A modification was evaluated by in vivo ubiquitination assay using  
3 denatured cell lysates and anti-HA mAb-Magnetic Beads. (E, and F) HEK293 cells were  
4 transfected with the indicated expression plasmids, and the lysates were subjected to co-  
5 immunoprecipitation assays using anti-FLAG M2 Magnetic Beads or anti-HA mAb-Magnetic  
6 Beads. The immunoprecipitants were subjected to western blot analyses. (G) The influence of  
7 KLHL12 on LZTR1-mediated RIT1 ubiquitination was evaluated by in vivo ubiquitination  
8 assay using denatured cell lysates and anti-FLAG M2 Magnetic Beads.  
9

**Supplementary Table 1. Primers used for construct preparation.**

| Construct name/mutated position | Forward primer (5' to 3')                                              | Reverse primer (5' to 3')                                             |
|---------------------------------|------------------------------------------------------------------------|-----------------------------------------------------------------------|
| HA-LZTR1                        | TGGAACATCGTATGGGTACATGGTGAAG<br>GGCTCCTTCTTAAAG                        | GATTACGCTGGTGGAGGTGGATCAGCTGGACC<br>GGGC                              |
| KLHL12                          | CACCATGGGAGGCATTATGGCCCC                                               | CTTCTCGCGGAGAACAC                                                     |
| KLHL12-FLAG                     | gacatcgactacaaggatgacgatgacaagTAGTGAAAG<br>GGTGGGCGCGCCGACCCAGCTTTCTTG | atgatctttataatcacctgatggtctttgtagtcCTTCTCGCGGAG<br>AACACAAACACCAGCATC |
| SEC31A                          | CACCATGAAGTTAAAGGAAGTAGATCGT<br>ACAGCC                                 | GACACCCAGCTTATTGGCCTGGG                                               |
| FLAG-KRAS                       | GGTGGAGGTGGATCAATGACTGAATATA<br>AACTTGTGGTAGTTGG                       | CTTGTCATCGTCGTCCTTGTAGTCCATGGTGAA<br>GGGCTCCTTCTTAAAG                 |
| FLAG-KRAS-G12C                  | TGTGGCGTAGGCAAGAGTGCC                                                  | AGCTCCAACCTACCACAAGTTTATATTCAG                                        |
| FLAG-KRAS-G12D                  | ATGGCGTAGGCAAGAGTGCCTTG                                                | CAGCTCCAACCTACCACAAGTTTATATTC                                         |
| FLAG-KRAS-G12S                  | AGTGGCGTAGGCAAGAGTGCCTTG                                               | AGCTCCAACCTACCACAAGTTTATATTCAG                                        |
| FLAG-KRAS-G12V                  | TTGGCGTAGGCAAGAGTGCCTTGACG                                             | CAGCTCCAACCTACCACAAGTTTATATTCAG                                       |



---

FLAG-KRAS-G13D

ACGTAGGCAAGAGTGCCTTGACGATAC

CACCAGCTCCTCACTACCACAAG

---

FLAG-KRAS-G13S

AGCGTAGGCAAGAGTGCCTTGACG

ACCAGCTCCTCACTACCACAAG

---

**Supplementary Table 2. Primers for RT-qPCR.**

| <i>Genes</i>       | Forward primer (5' to 3') | Reverse primer (5' to 3')  |
|--------------------|---------------------------|----------------------------|
| 18S rRNA           | ACCGCGGTTCTATTTTGTTG      | AGTCGGCATCGTTTATGGTC       |
| <i>LZTR1</i>       | GGTGGAGACAATGGGAAGACC     | GTGGGGTCCCAGTGGTAAAG       |
| <i>RREB1</i>       | CCCGGCCGTTGCTCC           | TCTCTTGGTAGTACTCGTTGACA    |
| <i>CDH1 (ECAD)</i> | TGAGCACGTGAAGAACAGCA      | GGTATGGGGGCGTTGTCATT       |
| <i>CDH2 (NCAD)</i> | TCGAAGGATGTGCATGAAGGA     | GCAGGCTCACTGCTCTCATA       |
| <i>SNAIL</i>       | CTAGGCCCTGGCTGCTACAA      | GACATCTGAGTGGGTCTGGAG      |
| <i>SLUG</i>        | CATGCCTGTCATACCACAAC      | GGTGTCAGATGGAGGAGGG        |
| <i>ZEB1</i>        | GACAGTGTTACCAGGGAGGAG     | ACTCGCATTTCATCATCTTTTACTGT |
| <i>ZO-1</i>        | GTCCAGAATCTCGGAAAAGTGCC   | CTTTCAGCGCACCATAACCAACC    |
| <i>VIM</i>         | GCCGAAAACACCCTGCAATC      | GCGTTCAAGGTCAAGACGTG       |
| <i>CLDN1</i>       | GGGCAGATCCAGTGCAAAGT      | GAGGATGCCAACCACCATCA       |
| <i>FNI</i>         | CCCTGGTGTCACAGAGGCTA      | GTTGGGGAAGCTCGTCTGTC       |
| <i>COL1A1</i>      | GGCTCCTGCTCCTCTTAGC       | GGTTCCACACGTCTCGGTC        |
