# Supplementary material for: LZTR1 deficiency exerts high metastatic potential by enhancing sensitivity to EMT induction and controlling KLHL12-mediated collagen secretion
Source: PubMed Central journal article supplement (PMC10457367; doi:10.1038/s41419-023-06072-9), 2023-08-25
Supplement: 41419_2023_6072_MOESM2_ESM.pdf [file 41419_2023_6072_MOESM2_ESM.pdf]

# 1 Supplementary Figure S5: Original western blots

2

Original western blots: Figure 1A

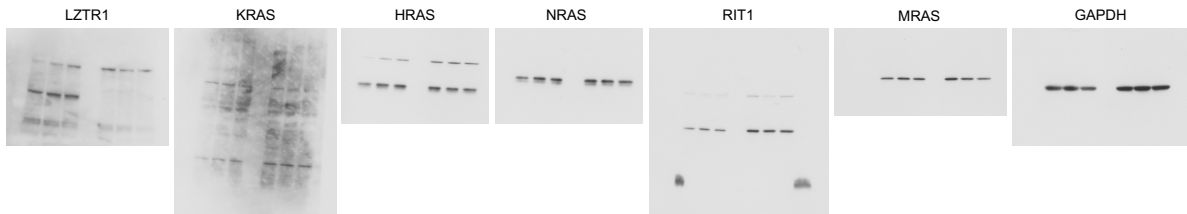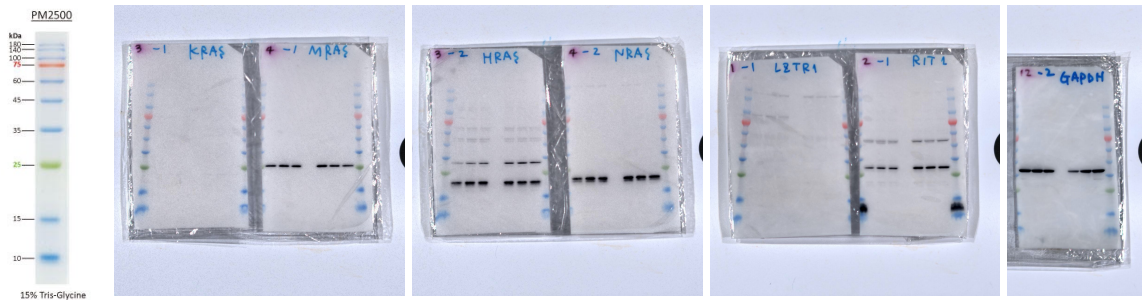

ExcelBand 3-color Regular Range Protein Marker (SMOBIO #PM2500)  
URL: [https://www.cosmobio.co.jp/product/detail/excelband-protein-ladder-smo.asp?entry\\_id=13990](https://www.cosmobio.co.jp/product/detail/excelband-protein-ladder-smo.asp?entry_id=13990)

3

4

5

Original western blots: Figure 2B

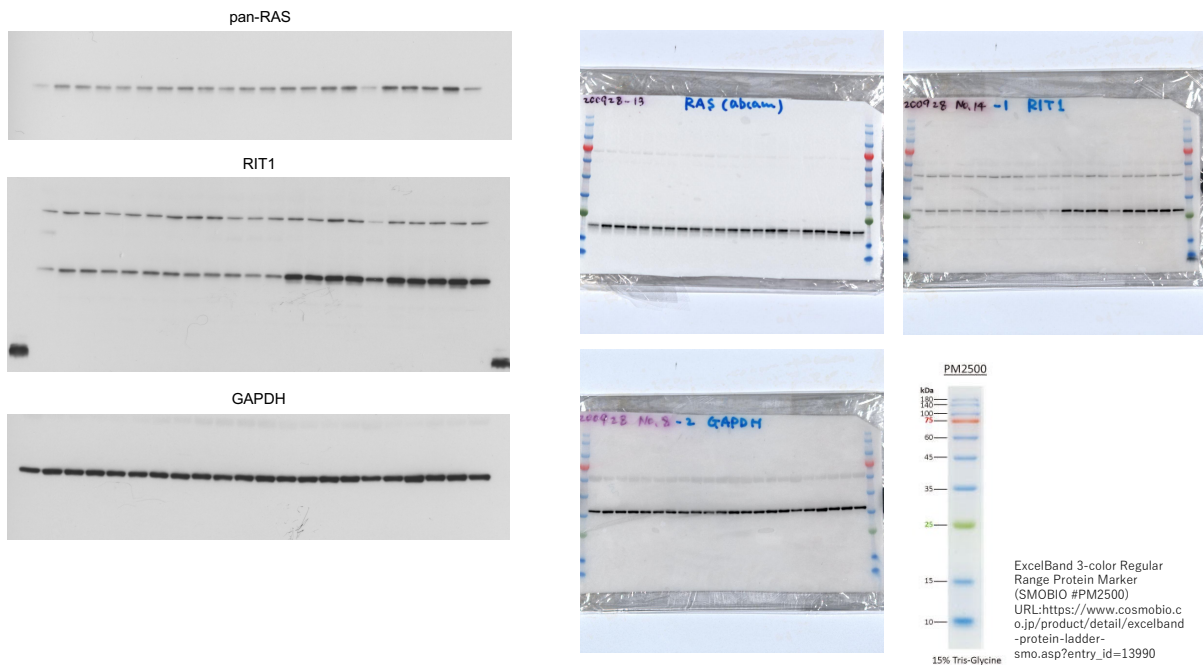

6

7

Original western blots: Figure 4B

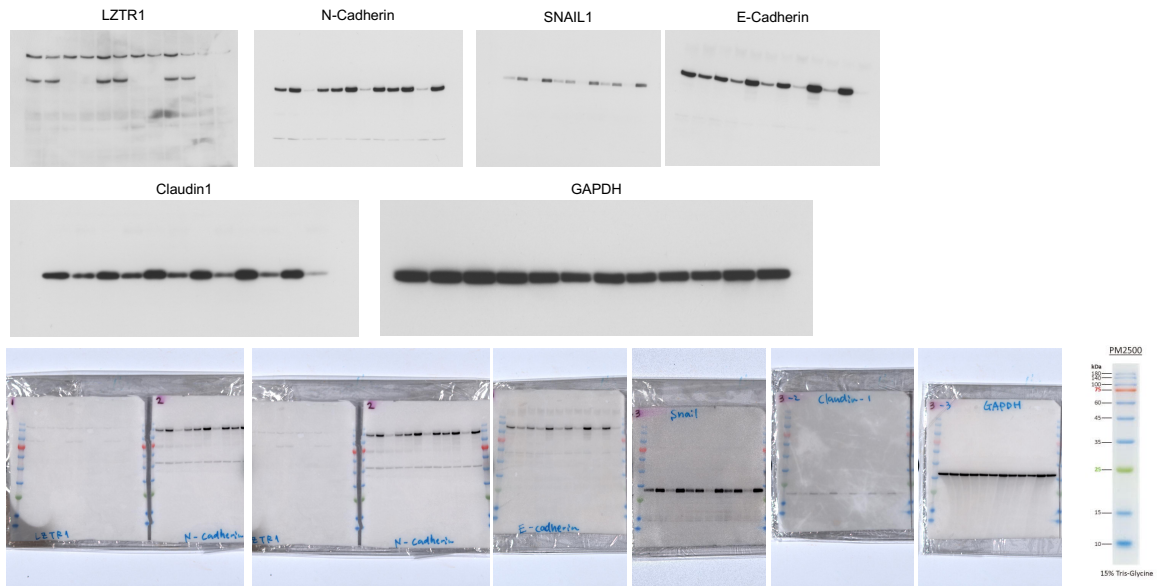

ExcelBand 3-color Regular Range Protein Marker (SMOBIO #PM2500)  
 URL: [https://www.cosmobio.co.jp/product/detail/excelband-protein-ladder-smo.asp?entry\\_id=13990](https://www.cosmobio.co.jp/product/detail/excelband-protein-ladder-smo.asp?entry_id=13990)

1  
2

Original western blots: Figure 5

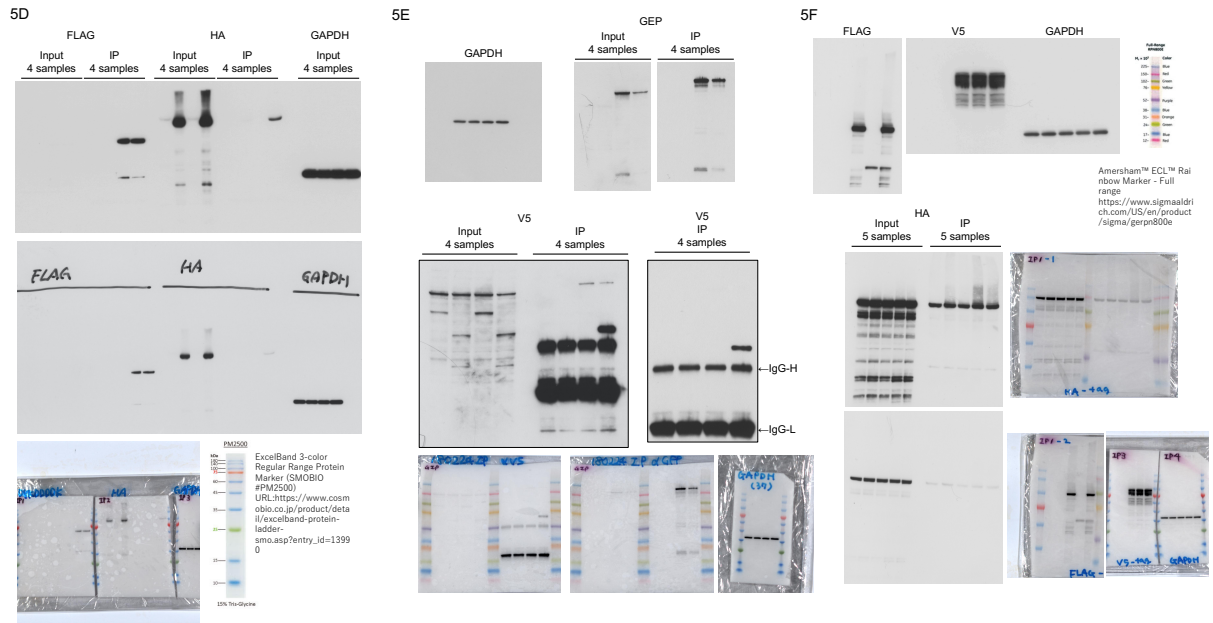

3
